# Supplementary material for: Correlations between the anti-corrosion properties and the photocatalytic behavior of epoxy coatings incorporating modified graphene oxide deposited on a zinc substrate
Source: Royal Society of Chemistry journal article supplement (doi:10.1039/d4ra00413b), 2024-01-01
Supplement: d4ra00413b1.pdf [file d4ra00413b1.pdf]

## Supplementary Material

### Correlations between the Anti-Corrosion Properties and the Photocatalytic Behavior of Epoxy Coatings Incorporating Modified Graphene Oxide Deposited on Zinc Substrate

Tamara-Rita Ovari<sup>1</sup>, Boglárka Trufán<sup>1</sup>, Gabriel Katona<sup>2</sup>, Gabriella Szabó<sup>2,\*</sup>  
and Liana Maria Muresan<sup>1</sup>

*Table S1. Bode plots parameters obtained by graphical analysis of the spectra Figure 5*

| Sample         | $10^{-9*}$<br>$A_1$ | $10^{-9*}$<br>$A_1'$ | $\frac{A_1}{A_{1t}}$ | $10^{-9*}$<br>$A_{1t}$ | $10^{-9*}$<br>$A_{1t}'$ | $\frac{A_1'}{A_{1t}'}$ | BPhc<br>$10^{-9x}$<br>( $A_{1t} - A_1$ ) | BPhc% | APhc<br>$10^{-9x}$<br>( $A_{1t}' - A_1'$ ) | APhc% |
|----------------|---------------------|----------------------|----------------------|------------------------|-------------------------|------------------------|------------------------------------------|-------|--------------------------------------------|-------|
| Zn/EP          | 0.99                | 0.12                 | 0.09                 | 11.03                  | 1.94                    | 0.06                   | 10.04                                    | 91.02 | 1.82                                       | 93.81 |
| Zn/EP-GO       | 5.81                | 2.08                 | 0.40                 | 14.52                  | 4.84                    | 0.43                   | 8.71                                     | 59.98 | 2.76                                       | 57.02 |
| Zn/EP-rGO      | 1.61                | 0.01                 | 0.39                 | 4.11                   | 0.41                    | 0.02                   | 2.50                                     | 60.83 | 0.40                                       | 97.56 |
| Zn/EP-APTES-GO | 9.85                | 5.72                 | 0.31                 | 31.85                  | 12.49                   | 0.46                   | 22.00                                    | 69.07 | 6.77                                       | 54.20 |
| Zn/EP-PAMAM-GO | 18.63               | 3.75                 | 0.36                 | 51.14                  | 9.75                    | 0.38                   | 32.51                                    | 63.57 | 6.00                                       | 61.53 |

The meaning of the parameters in the Table 1S are:

- $A_1, A_1'$  capacitive region area before and after photocatalysis
- $A_{1t}, A_{1t}'$  total area beneath the impedance modulus curve before and after photocatalysis.
- $\frac{A_1}{A_{1t}}, \frac{A_1'}{A_{1t}'}$  the ratio of the area of the capacitive region to the total area before and after photocatalysis.
- $BPhc (A_{1t} - A_1)$  resistive region area before photocatalysis,
- $APhc (A_{1t}' - A_1')$  resistive region area after photocatalysis
- $BPhc \%$  resistive region % before photocatalysis

➤ APhc % resistive region % after photocatalysis

Table S2 Equivalent circuits and EC parameters for the recorded EIS spectra before photocatalysis

| Sample         |                                                                                     | $R_s$<br>(k $\Omega$ cm $^2$ ) | $Q_{coat}$<br>( $\mu S s^n/cm^2$ ) | n   | $R_{coat}$<br>(k $\Omega$ cm $^2$ ) | $Q_1$<br>( $\mu S s^n/cm^2$ ) | n   | $R_1$<br>(k $\Omega$ cm $^2$ ) | $Q_{dl}$<br>( $\mu S s^n/cm^2$ ) | n   | $R_{ct}$<br>(k $\Omega$ cm $^2$ ) | $R_p = R_{coat} + R_{ct} (+R_1)$<br>(k $\Omega$ cm $^2$ ) | Chi $^2$              |
|----------------|-------------------------------------------------------------------------------------|--------------------------------|------------------------------------|-----|-------------------------------------|-------------------------------|-----|--------------------------------|----------------------------------|-----|-----------------------------------|-----------------------------------------------------------|-----------------------|
| Zn/EP          | 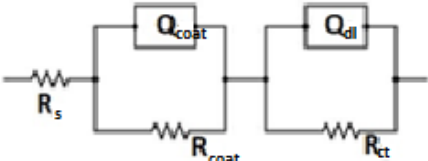   | ~0                             | $3.4 \times 10^{-2}$               | 0.8 | 1867                                | -                             | -   | -                              | $2.7 \times 10^{-3}$             | 0.9 | 236                               | 2103                                                      | $4.31 \times 10^{-3}$ |
| Zn/EP-rGO      |    | 2.63                           | $7.04 \times 10^{-4}$              | 0.9 | 930                                 | $1.51 \times 10^{-2}$         | 1   | 162                            | 39.42                            | 1   | 425                               | 1517                                                      | $8.47 \times 10^{-3}$ |
| Zn/EP-GO       |   | 1.43                           | $9.67 \times 10^{-4}$              | 0.9 | 728                                 | $2.40 \times 10^{-2}$         | 0.8 | 1146                           | 1.98                             |     | 1565                              | 3439                                                      | $6.57 \times 10^{-3}$ |
| Zn/EP-GO-APTES |  | 2.40                           | $2.54 \times 10^{-3}$              | 0.9 | 1083                                | $6.76 \times 10^{-2}$         | 0.5 | 7184                           | $9.31 \times 10^{-4}$            |     | 923                               | 9193                                                      | $6.97 \times 10^{-3}$ |

|                |  |       |                       |     |     |                       |   |     |                       |     |      |       |                       |
|----------------|--|-------|-----------------------|-----|-----|-----------------------|---|-----|-----------------------|-----|------|-------|-----------------------|
| Zn/EP-GO-PAMAM |  | 11.02 | $2.38 \times 10^{-4}$ | 0.9 | 950 | $5.34 \times 10^{-4}$ | 1 | 969 | $4.77 \times 10^{-3}$ | 0.5 | 9687 | 11606 | $3.43 \times 10^{-3}$ |
|----------------|--|-------|-----------------------|-----|-----|-----------------------|---|-----|-----------------------|-----|------|-------|-----------------------|

Table S3 Equivalent circuits and EC parameters for the recorded EIS spectra after photocatalysis

| Sample         |                                                                                     | $R_s$<br>( $k\Omega\text{ cm}^2$ ) | $Q_{\text{coat}}$<br>( $\mu\text{Ss}^n/\text{cm}^2$ ) | n   | $R_{\text{coat}}$<br>( $k\Omega\text{ cm}^2$ ) | $Q_{\text{dl}}$<br>( $\mu\text{Ss}^n/\text{cm}^2$ ) | n   | $R_{\text{ct}}$<br>( $k\Omega\text{ cm}^2$ ) | $R_p = R_{\text{coat}} + R_{\text{ct}}$<br>( $k\Omega\text{ cm}^2$ ) | Chi <sup>2</sup>      |
|----------------|-------------------------------------------------------------------------------------|------------------------------------|-------------------------------------------------------|-----|------------------------------------------------|-----------------------------------------------------|-----|----------------------------------------------|----------------------------------------------------------------------|-----------------------|
| Zn/EP          | 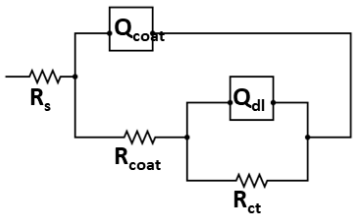   | 3.72                               | $2.36 \times 10^{-4}$                                 | 0.9 | 182                                            | 1.19                                                | 0.3 | 606                                          | 788                                                                  | $5.48 \times 10^{-3}$ |
| Zn/EP-GO       |    | 1.24                               | $8.99 \times 10^{-4}$                                 | 0.9 | 783                                            | $7.83 \times 10^{-2}$                               | 0.9 | 369                                          | 1152                                                                 | $4.92 \times 10^{-3}$ |
| Zn/EP-rGO      |   | 0.14                               | 1.33                                                  | 0.6 | 81                                             | 342                                                 | 0.8 | 43                                           | 124                                                                  | $8.45 \times 10^{-4}$ |
| Zn/EP-GO-APTES |  | 2.37                               | $5.26 \times 10^{-4}$                                 |     | 1783                                           | $1.06 \times 10^{-1}$                               | 0.6 | 988                                          | 2771                                                                 | $4.54 \times 10^{-3}$ |

|                |                                                                                   |      |                       |     |      |                       |     |      |      |                       |
|----------------|-----------------------------------------------------------------------------------|------|-----------------------|-----|------|-----------------------|-----|------|------|-----------------------|
| Zn/EP-GO-PAMAM | 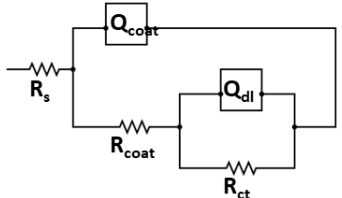 | 2.47 | $5.70 \times 10^{-4}$ | 0.9 | 1012 | $3.15 \times 10^{-1}$ | 0.3 | 1269 | 2281 | $2.79 \times 10^{-3}$ |
|----------------|-----------------------------------------------------------------------------------|------|-----------------------|-----|------|-----------------------|-----|------|------|-----------------------|

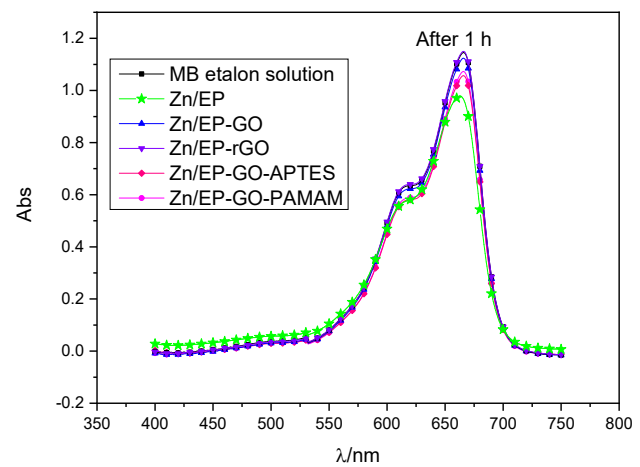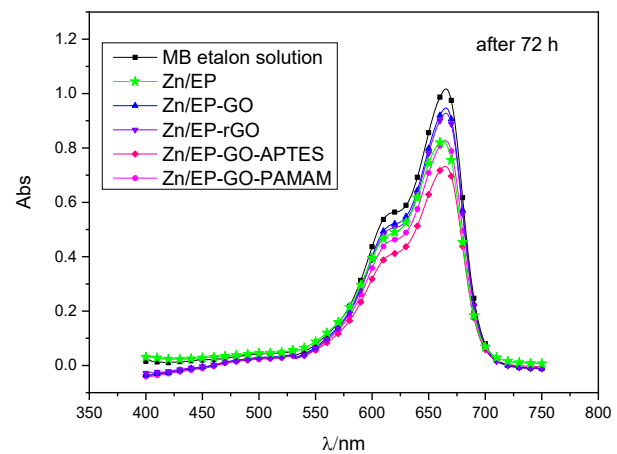

Figure S1. Decrease of the absorbance of MB dye solution due to the immersion for a) 1 h and b) 72h of Zn/EP, Zn/EP-GO, Zn/EP-rGO, Zn/EP-GO-APTES and Zn/EP-GO-PAMAM samples kept in dark for reference.

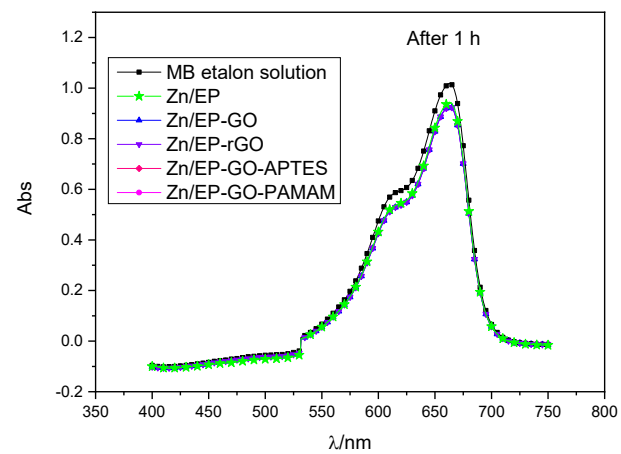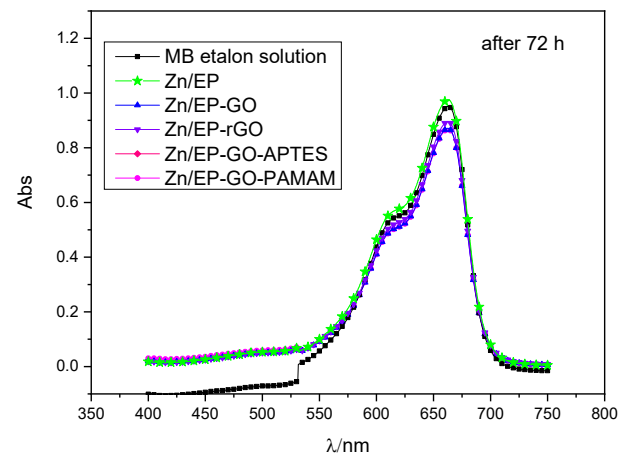

Figure S2. Decrease of the absorbance of MB dye solution due to the immersion for a) 1 h and b) 72h of EP, EP-GO, EP-rGO, EP-GO-APTES and EP-GO-PAMAM coatings on glass substrate.

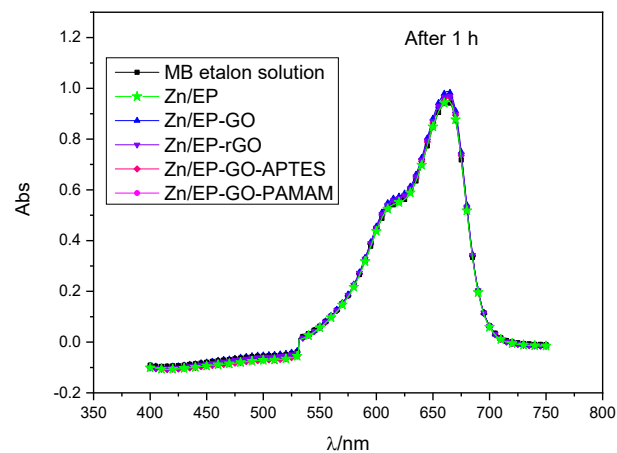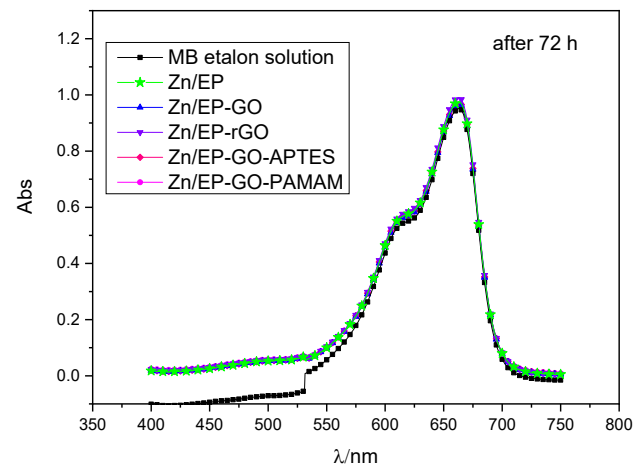

Figure S3. Decrease of the absorbance of MB dye solution due to the immersion for a) 1 h and b) 72h of EP, EP-GO, EP-rGO, EP-GO-APTES and EP-GO-PAMAM coatings on glass substrate kept in dark for reference.

Table S4. Photodegradation of MB on glass substrates, coated with EP resin and EP containing different GOs

| Coatings           | MB degradation %<br>Light | MB degradation %<br>Dark |
|--------------------|---------------------------|--------------------------|
|                    | Glass Substrate           | Glass Substrate          |
| MB etalon solution | 9.9                       | 7.8                      |
| EP                 | 7.7                       | 5.8                      |
| EP-GO              | 14.1                      | 5.5                      |
| EP-rGO             | 14.1                      | 5.5                      |
| EP-GO-APTES        | 12.5                      | 4.0                      |
| EP-GO-PAMAM        | 7.9                       | 5.0                      |
